# Supplementary material for: Altered regulation of mesenchymal cell senescence promotes pathological changes associated with diabetic wound healing
Source: Research Square preprint supplement (doi:10.21203/rs.3.rs-568349/v1), 2021-06-03
Supplement: Supplementary file 1 [file 6af2a3e1ada37b645db28d8e.pdf]

## Reporting Summary

Nature Research wishes to improve the reproducibility of the work that we publish. This form provides structure for consistency and transparency in reporting. For further information on Nature Research policies, see our [Editorial Policies](#) and the [Editorial Policy Checklist](#).

### Statistics

For all statistical analyses, confirm that the following items are present in the figure legend, table legend, main text, or Methods section.

n/a Confirmed

- ☐ ☒ The exact sample size ( $n$ ) for each experimental group/condition, given as a discrete number and unit of measurement
- ☐ ☒ A statement on whether measurements were taken from distinct samples or whether the same sample was measured repeatedly
- ☐ ☒ The statistical test(s) used AND whether they are one- or two-sided  
*Only common tests should be described solely by name; describe more complex techniques in the Methods section.*
- ☒ ☐ A description of all covariates tested
- ☐ ☒ A description of any assumptions or corrections, such as tests of normality and adjustment for multiple comparisons
- ☐ ☒ A full description of the statistical parameters including central tendency (e.g. means) or other basic estimates (e.g. regression coefficient) AND variation (e.g. standard deviation) or associated estimates of uncertainty (e.g. confidence intervals)
- ☐ ☒ For null hypothesis testing, the test statistic (e.g.  $F$ ,  $t$ ,  $r$ ) with confidence intervals, effect sizes, degrees of freedom and  $P$  value noted  
*Give  $P$  values as exact values whenever suitable.*
- ☒ ☐ For Bayesian analysis, information on the choice of priors and Markov chain Monte Carlo settings
- ☐ ☒ For hierarchical and complex designs, identification of the appropriate level for tests and full reporting of outcomes
- ☐ ☒ Estimates of effect sizes (e.g. Cohen's  $d$ , Pearson's  $r$ ), indicating how they were calculated

*Our web collection on [statistics for biologists](#) contains articles on many of the points above.*

### Software and code

Policy information about [availability of computer code](#)

|                 |                                                                                                                                                                                                                                                                                                                                                                                                                                                                                                                                                                                                                                                                                                                                                                                                                                                                                                                                                                                                                                                                                                   |
|-----------------|---------------------------------------------------------------------------------------------------------------------------------------------------------------------------------------------------------------------------------------------------------------------------------------------------------------------------------------------------------------------------------------------------------------------------------------------------------------------------------------------------------------------------------------------------------------------------------------------------------------------------------------------------------------------------------------------------------------------------------------------------------------------------------------------------------------------------------------------------------------------------------------------------------------------------------------------------------------------------------------------------------------------------------------------------------------------------------------------------|
| Data collection | Histological and immunohistochemical data collection were conducted fluorescence microscope BZ-X700 (Keyence Corp., Osaka, Japan). Immunoblotting data collection were conducted ChemiDOC MP (BioRad) and Image Lab Software (BioRad). Image J software, version 1.5 (National Institutes of Health, Bethesda, MD, USA) was used for data analysis.                                                                                                                                                                                                                                                                                                                                                                                                                                                                                                                                                                                                                                                                                                                                               |
| Data analysis   | Statistical analyses were performed using R (The R Foundation for Statistical Computing, Vienna, Austria). Statistical significance between two groups was determined using an unpaired t-test. A one-way or two-way analysis of variance (ANOVA) was conducted to assess differences among three or more groups. Pairwise comparisons were made only when the ANOVA test identified a statistical significance. p-values for multiple comparisons were adjusted using the Tukey method. Statistical analyses were performed using EZR, which is a graphical user interface for R. Quantitative data are presented as either the mean±standard error of the mean (SEM) or median with interquartile range (IQR) and $1.5 \times \text{IQR}$ . Box-and-whisker plots and bar plots were generated using ggplot2, a plotting system for R based on The Grammar of Graphics (The R Foundation for Statistical Computing, Vienna, Austria). The R packages FactoMineR and factoextra were used to generate heat maps, Ward's hierarchical agglomerative clustering, and principal component analyses. |

For manuscripts utilizing custom algorithms or software that are central to the research but not yet described in published literature, software must be made available to editors and reviewers. We strongly encourage code deposition in a community repository (e.g. GitHub). See the Nature Research [guidelines for submitting code & software](#) for further information.

## Data

Policy information about [availability of data](#)

All manuscripts must include a [data availability statement](#). This statement should provide the following information, where applicable:

- Accession codes, unique identifiers, or web links for publicly available datasets
- A list of figures that have associated raw data
- A description of any restrictions on data availability

The data that support the findings of this study are available from the corresponding author upon reasonable request.

## Field-specific reporting

Please select the one below that is the best fit for your research. If you are not sure, read the appropriate sections before making your selection.

- ☒ Life sciences ☐ Behavioural & social sciences ☐ Ecological, evolutionary & environmental sciences

For a reference copy of the document with all sections, see [nature.com/documents/nr-reporting-summary-flat.pdf](https://www.nature.com/documents/nr-reporting-summary-flat.pdf)

## Life sciences study design

All studies must disclose on these points even when the disclosure is negative.

|                 |                                                                                                                     |
|-----------------|---------------------------------------------------------------------------------------------------------------------|
| Sample size     | Power calculations were not performed to predetermine the sample size.                                              |
| Data exclusions | Mice were only excluded from the study if they had visible wounds from fighting.                                    |
| Replication     | All experiments were replicated in a at least two independent experiments performed under identical conditions.     |
| Randomization   | We did not use any specific method of randomization to determine how animals were allocated to experimental groups. |
| Blinding        | The investigators were not blinded to allocations during experiments or outcome assessments.                        |

## Reporting for specific materials, systems and methods

We require information from authors about some types of materials, experimental systems and methods used in many studies. Here, indicate whether each material, system or method listed is relevant to your study. If you are not sure if a list item applies to your research, read the appropriate section before selecting a response.

### Materials & experimental systems

| n/a                                 | Involved in the study                                           |
|-------------------------------------|-----------------------------------------------------------------|
| <input type="checkbox"/>            | <input checked="" type="checkbox"/> Antibodies                  |
| <input checked="" type="checkbox"/> | <input type="checkbox"/> Eukaryotic cell lines                  |
| <input checked="" type="checkbox"/> | <input type="checkbox"/> Palaeontology and archaeology          |
| <input type="checkbox"/>            | <input checked="" type="checkbox"/> Animals and other organisms |
| <input type="checkbox"/>            | <input checked="" type="checkbox"/> Human research participants |
| <input checked="" type="checkbox"/> | <input type="checkbox"/> Clinical data                          |
| <input checked="" type="checkbox"/> | <input type="checkbox"/> Dual use research of concern           |

### Methods

| n/a                                 | Involved in the study                           |
|-------------------------------------|-------------------------------------------------|
| <input checked="" type="checkbox"/> | <input type="checkbox"/> ChIP-seq               |
| <input checked="" type="checkbox"/> | <input type="checkbox"/> Flow cytometry         |
| <input checked="" type="checkbox"/> | <input type="checkbox"/> MRI-based neuroimaging |

## Antibodies

|                 |                                                                                                                                                                                                                                                                                                                                                                                                                                                                                                                                                                                                                                                                                                                                                                                                                                                                                                                                                        |
|-----------------|--------------------------------------------------------------------------------------------------------------------------------------------------------------------------------------------------------------------------------------------------------------------------------------------------------------------------------------------------------------------------------------------------------------------------------------------------------------------------------------------------------------------------------------------------------------------------------------------------------------------------------------------------------------------------------------------------------------------------------------------------------------------------------------------------------------------------------------------------------------------------------------------------------------------------------------------------------|
| Antibodies used | Antibody/Clone/Dulution/Source/Cat. No.<br>Rabbit anti-p15/polyclonal/ 1:500/ abcam/ ab53034<br>Rabbit anti-PDGFR-a /D1E1E/1:500-1000/Cell Signaling Technology/ 3274S<br>Rabbit anti-a-SAM /D4K9N/1:500/Cell Signaling Technology/ 19245S<br>Rabbit anti-phosphpa-histone H2A.X(Ser139)/20E3/1:480/Cell Signaling Technology/ 9718S                                                                                                                                                                                                                                                                                                                                                                                                                                                                                                                                                                                                                   |
| Validation      | Antibody/Clone/Dulution/Source/Cat. No.<br>Rabbit anti-p15: <a href="https://www.abcam.co.jp/p15-ink4b-antibody-ab53034.html">https://www.abcam.co.jp/p15-ink4b-antibody-ab53034.html</a><br>Rabbit anti-PDGFR-a : <a href="https://en.cellsignal.jp/products/primary-antibodies/pdgf-receptor-a-d1e1e-xp-rabbit-mab/3174">https://en.cellsignal.jp/products/primary-antibodies/pdgf-receptor-a-d1e1e-xp-rabbit-mab/3174</a><br>Rabbit anti-a-SAM : <a href="https://en.cellsignal.jp/products/primary-antibodies/a-smooth-muscle-actin-d4k9n-xp-rabbit-mab/19245">https://en.cellsignal.jp/products/primary-antibodies/a-smooth-muscle-actin-d4k9n-xp-rabbit-mab/19245</a><br>Rabbit anti-phosphpa-histone H2A.X(Ser139): <a href="https://en.cellsignal.jp/products/primary-antibodies/phospho-histone-h2a-x-ser139-20e3-rabbit-mab/9718">https://en.cellsignal.jp/products/primary-antibodies/phospho-histone-h2a-x-ser139-20e3-rabbit-mab/9718</a> |

## Animals and other organisms

Policy information about [studies involving animals](#); [ARRIVE guidelines](#) recommended for reporting animal research

|                         |                                                                                                                                                                |
|-------------------------|----------------------------------------------------------------------------------------------------------------------------------------------------------------|
| Laboratory animals      | Male C57BLKS/Jlar-+Leprdb/+Leprdb (Leprdb/db), male C57BLKS/Jlar-m+/+Leprdb (Leprdb/+), and male C57BL/6 mice (age>11 weeks; Sankyo Lab Service, Tokyo, Japan) |
| Wild animals            | This study did not use wild animals.                                                                                                                           |
| Field-collected samples | This study did not use field-collected samples.                                                                                                                |
| Ethics oversight        | The Committee of the Animal Experimentation Center at the Sapporo Medical University School of Medicine approved all animal protocols.                         |

Note that full information on the approval of the study protocol must also be provided in the manuscript.

## Human research participants

Policy information about [studies involving human research participants](#)

|                            |                                                                                                                                                                                                                                                                                                                                                                                        |
|----------------------------|----------------------------------------------------------------------------------------------------------------------------------------------------------------------------------------------------------------------------------------------------------------------------------------------------------------------------------------------------------------------------------------|
| Population characteristics | Six wound tissue samples from five diabetic patients (age: $68.7 \pm 9.0$ years old; HbA1c(NGSP): $7.02 \pm 2.15\%$ ) and six wound tissue samples from six non-diabetic patients (age: $58.0 \pm 21.7$ years old) were used in the study. The tissues used in the study were debrided and disposed during surgery for treatment, and no additional excisions were made for the study. |
| Recruitment                | Samples were recruited after agreement was obtained through informed consent.                                                                                                                                                                                                                                                                                                          |
| Ethics oversight           | The Ethical Review Board at the Sapporo Medical University in Japan approved the study.                                                                                                                                                                                                                                                                                                |

Note that full information on the approval of the study protocol must also be provided in the manuscript.
